# Supplementary material for: SituSeq: an offline protocol for rapid and remote Nanopore 16S rRNA amplicon sequence analysis
Source: PubMed Central journal article supplement (PMC10119094; doi:10.1038/s43705-023-00239-3), 2023-04-20
Supplement: 43705_2023_239_MOESM1_ESM.pdf [file 43705_2023_239_MOESM1_ESM.pdf]

# Supplementary Material

## ***SituSeq*: An offline protocol for rapid and remote Nanopore 16S rRNA amplicon sequence analysis**

Jackie Zorz, Carmen Li, Anirban Chakraborty, Daniel Gittins, Taylor Surcon, Natasha Morrison, Robbie Bennett, Adam MacDonald, Casey R.J. Hubert

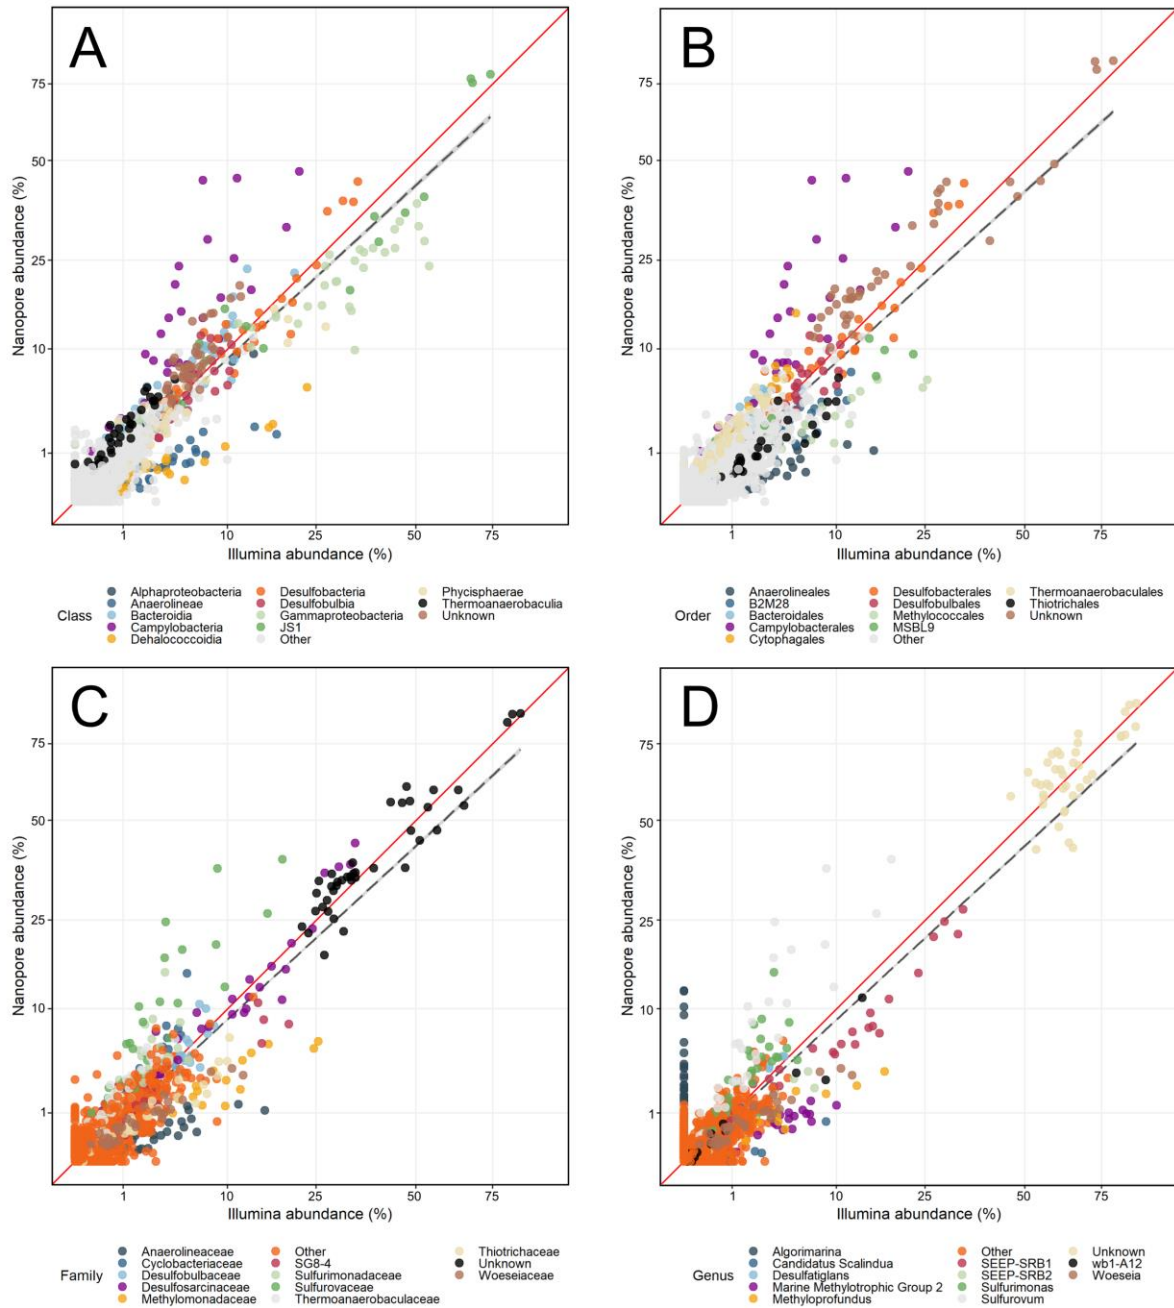

**S1 Figure. Correlation between relative abundance of most abundant taxa from Nanopore and Illumina data sets.** A) Class level (Pearson's  $r$ : 0.902), B) Order level (Pearson's  $r$ : 0.914), C) Family level (Pearson's  $r$ : 0.958), D) Genus level (Pearson's  $r$ : 0.976). "Unknown" refers to the proportion of taxa that were unclassified at that taxonomic level, while "Other" refers to taxa with lower abundance. Red line corresponds to a 1:1 ratio, dashed line shows the linear relationship between the two sequencing methods.

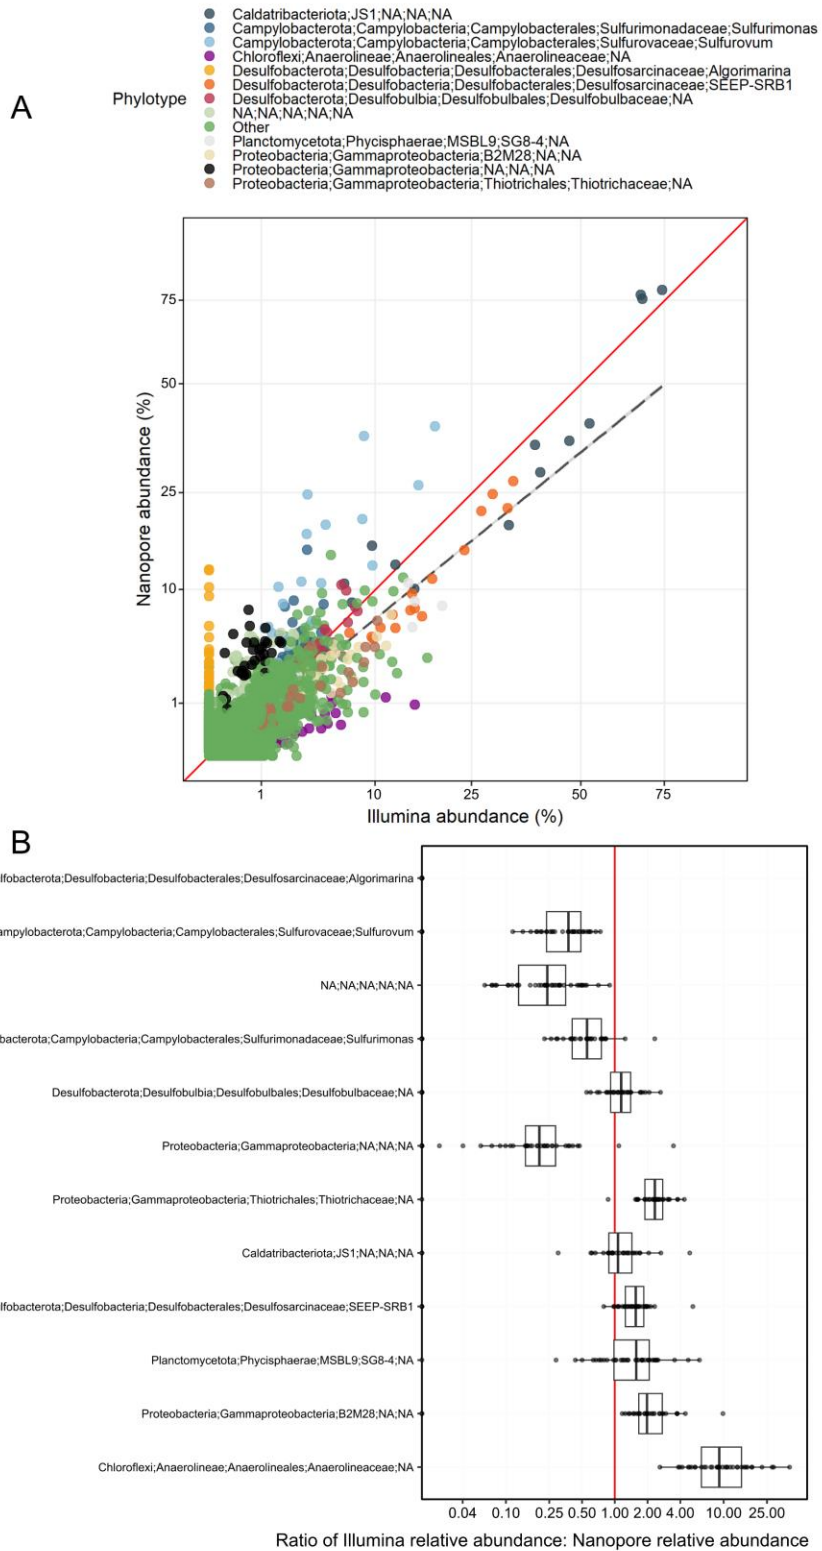

**S2 Figure. Comparison of Nanopore and Illumina amplicon data sets at the level of the highest classified taxonomy, or phylotype.** A) Correlation between Nanopore and Illumina abundance (Pearson's  $r$ : 0.89). B) Ratio of relative abundance between Illumina and Nanopore libraries from most abundant phylotypes.

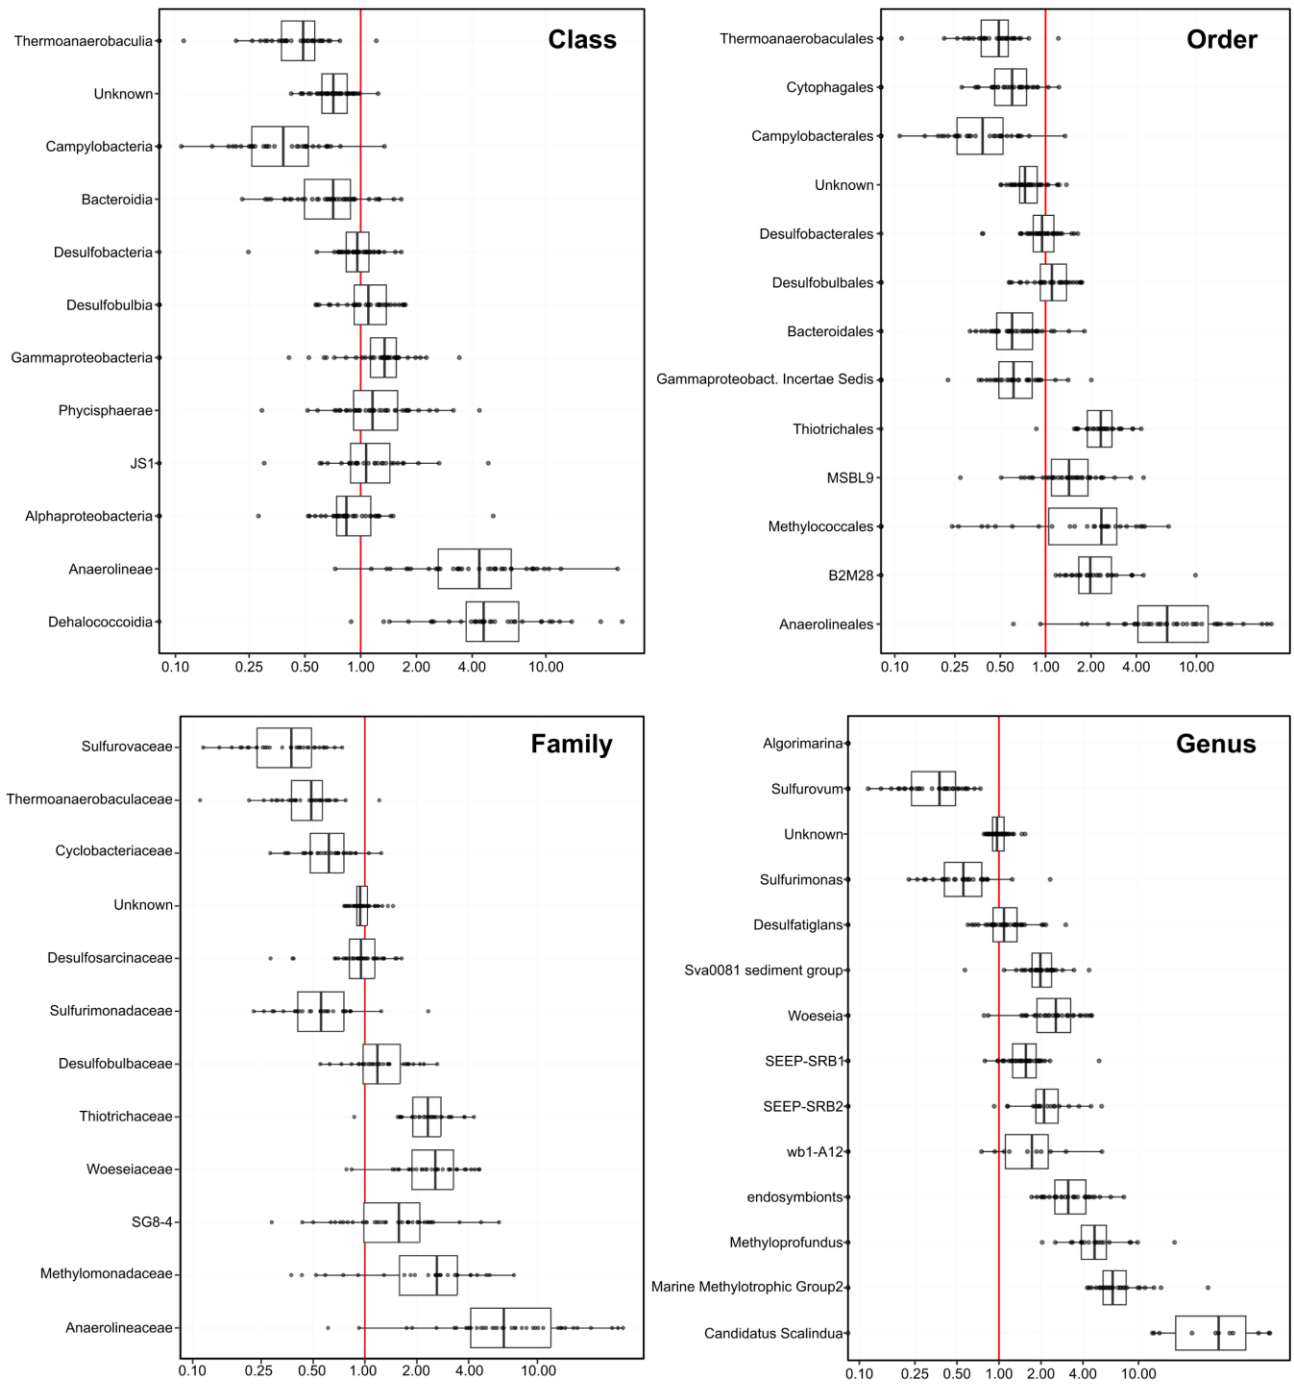

Ratio of Illumina relative abundance: Nanopore relative abundance

**S3 Figure. Ratio of Illumina abundance to Nanopore abundance of the most abundant taxa at each taxonomic level.** “Unknown” refers to the sequences that were unclassified at each taxonomic level.

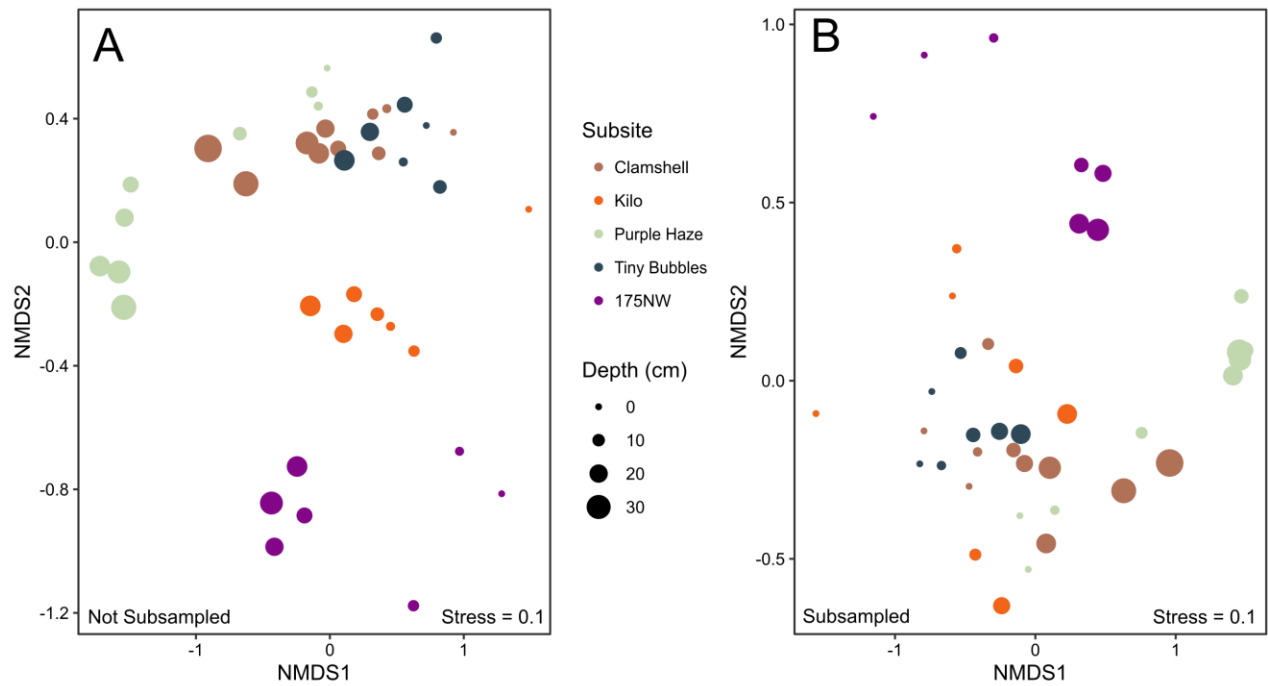

**S4 Figure. Genus level NMDS plot based on Bray-Curtis dissimilarity of the Nanopore data.** (A) Libraries not subsampled, and (B) libraries subsampled to 1000 sequences. Points are coloured based on subsite and sized based on depth below sediment surface. Non-subsampled ANOSIM R (site): 0.52 ( $p < 1e-4$ ); subsampled ANOSIM R (site): 0.43 ( $p < 1e-4$ )

**S1 Table. Primer sequences used for Nanopore and Illumina PCR reactions.**

| <b>Primer Set</b> | <b>Primer Name</b> | <b>16S rRNA region</b> | <b>Sequence</b>                                          |
|-------------------|--------------------|------------------------|----------------------------------------------------------|
| <b>Nanopore</b>   | 27F/1492R          | V1-V9                  | 5' AGAGTTTGATCMTGGCTCAG 3'<br>5' CGGTTACCTTGTTACGACTT 3' |
| <b>Illumina</b>   | 515F/806R          | V4                     | 5' GTGYCAGCMGCCGCGGTAA 3'<br>5' GGACTACNVGGGTWTCTAAT 3'  |

**S2 Table. Thermocycler programs for both Nanopore and Illumina PCR reactions.**

| <b>Program</b>        | <b>Temperature (°C)</b> | <b>Time (seconds)</b> | <b>Cycles</b> |
|-----------------------|-------------------------|-----------------------|---------------|
| <b>Nanopore 16S</b>   | 95                      | 60                    | 1             |
|                       | 95                      | 30                    | 25            |
|                       | 55                      | 45                    |               |
|                       | 72                      | 120                   |               |
|                       | 72                      | 300                   | 1             |
| <b>Illumina 16S</b>   | 95                      | 180                   | 1             |
|                       | 95                      | 30                    | 10            |
|                       | 60                      | 45                    |               |
|                       | 72                      | 60                    |               |
|                       | 95                      | 30                    | 20            |
|                       | 55                      | 45                    |               |
|                       | 72                      | 60                    |               |
|                       | 72                      | 300                   | 1             |
| <b>Illumina Index</b> | 95                      | 180                   | 1             |
|                       | 95                      | 30                    | 10            |
|                       | 55                      | 45                    |               |
|                       | 72                      | 60                    |               |
|                       | 72                      | 300                   | 1             |

**S3 Table. Differentially abundant phyla identified for various groupings.** Calculated by the *multipatt* function in the package *indicspecies*. Significance codes: 0\*\*\* ; 0.001\*\* ; 0.01\*

| Test                                                                                        | Group                                   | Phylum                                                    | Score       |                    |          |
|---------------------------------------------------------------------------------------------|-----------------------------------------|-----------------------------------------------------------|-------------|--------------------|----------|
| <b>Nanopore amplicon vs Illumina amplicon vs Illumina Metagenome (all sequences) (n=27)</b> | Nanopore amplicon                       | Dependentiae                                              | 0.625**     |                    |          |
|                                                                                             |                                         | Campylobacterota                                          | 0.458*      |                    |          |
|                                                                                             | Illumina metagenome                     | Firmicutes                                                | 0.739***    |                    |          |
|                                                                                             |                                         | RCP2-54                                                   | 0.639***    |                    |          |
|                                                                                             |                                         | Patescibacteria                                           | 0.602**     |                    |          |
|                                                                                             |                                         | Synergistota                                              | 0.597**     |                    |          |
|                                                                                             |                                         | WPS-2                                                     | 0.585*      |                    |          |
|                                                                                             |                                         | Aquificota                                                | 0.580*      |                    |          |
|                                                                                             |                                         | Halanaerobiaeota                                          | 0.511*      |                    |          |
|                                                                                             |                                         | NKB15                                                     | 0.475*      |                    |          |
|                                                                                             |                                         | Deferrisomatota                                           | 0.464*      |                    |          |
|                                                                                             |                                         | Actinobacteriota                                          | 0.459*      |                    |          |
|                                                                                             |                                         | Poribacteria                                              | 0.427**     |                    |          |
|                                                                                             | AncK6                                   | 0.342*                                                    |             |                    |          |
|                                                                                             | Illumina amplicon + Illumina metagenome | Calditrichota                                             | 0.575**     |                    |          |
| Chloroflexi                                                                                 |                                         | 0.481*                                                    |             |                    |          |
| Nanopore amplicon + Illumina metagenome                                                     | Unknown                                 | 0.734***                                                  |             |                    |          |
|                                                                                             | Verrucomicrobiota                       | 0.492*                                                    |             |                    |          |
|                                                                                             | Margulisbacteria                        | 0.480*                                                    |             |                    |          |
| <b>Nanopore amplicon vs Illumina amplicon (all sequences) (n=80)</b>                        | Nanopore amplicon                       | Unknown                                                   | 0.741***    |                    |          |
|                                                                                             |                                         | Dependentiae                                              | 0.618***    |                    |          |
|                                                                                             |                                         | Margulisbacteria                                          | 0.386***    |                    |          |
|                                                                                             |                                         | Verrucomicrobiota                                         | 0.368***    |                    |          |
|                                                                                             |                                         | Campylobacterota                                          | 0.333***    |                    |          |
|                                                                                             |                                         | Patescibacteria                                           | 0.311**     |                    |          |
|                                                                                             |                                         | MAT-CR-M4-B07                                             | 0.290**     |                    |          |
|                                                                                             |                                         | Deferrisomatota                                           | 0.285**     |                    |          |
|                                                                                             | Modulibacteria                          | 0.244*                                                    |             |                    |          |
|                                                                                             | Illumina amplicon                       | Chloroflexi                                               | 0.438***    |                    |          |
|                                                                                             |                                         | Calditrichota                                             | 0.362***    |                    |          |
|                                                                                             |                                         | Poribacteria                                              | 0.329***    |                    |          |
|                                                                                             |                                         | NKB15                                                     | 0.256**     |                    |          |
|                                                                                             |                                         | Marinimicrobia (SAR406)                                   | 0.241*      |                    |          |
|                                                                                             |                                         | Proteobacteria                                            | 0.232*      |                    |          |
|                                                                                             |                                         | Halanaerobiaeota                                          | 0.190***    |                    |          |
|                                                                                             |                                         | <b>Location – Nanopore samples (all sequences) (n=40)</b> | Purple Haze | WS2                | 0.770*** |
|                                                                                             |                                         |                                                           |             | Caldatribacteriota | 0.636**  |
| Acetothermia                                                                                |                                         |                                                           |             | 0.586***           |          |
| Caldisericota                                                                               | 0.535**                                 |                                                           |             |                    |          |
| FCPU426                                                                                     | 0.512*                                  |                                                           |             |                    |          |
| Cloacimonadota                                                                              | 0.511**                                 |                                                           |             |                    |          |
| Desulfobacterota                                                                            | 0.478*                                  |                                                           |             |                    |          |
| Fermentibacterota                                                                           | 0.421*                                  |                                                           |             |                    |          |
| Desantisbacteria                                                                            | 0.416*                                  |                                                           |             |                    |          |
| 175NW                                                                                       | Unknown                                 |                                                           |             | 0.907***           |          |
|                                                                                             | Sumerlaeota                             |                                                           |             | 0.875***           |          |
|                                                                                             | Acidobacteriota                         |                                                           | 0.849***    |                    |          |
|                                                                                             | Planctomycetota                         |                                                           | 0.795***    |                    |          |
|                                                                                             | Armatimonadota                          |                                                           | 0.679***    |                    |          |
|                                                                                             | Verrucomicrobiota                       |                                                           | 0.672***    |                    |          |
|                                                                                             | Nitrospinota                            |                                                           | 0.672***    |                    |          |
| BH180-139                                                                                   | 0.644**                                 |                                                           |             |                    |          |
| Hydrogenedentes                                                                             | 0.624***                                |                                                           |             |                    |          |
| 10bav-F6                                                                                    | 0.606**                                 |                                                           |             |                    |          |



|                                                                     |                          |                         |          |
|---------------------------------------------------------------------|--------------------------|-------------------------|----------|
|                                                                     |                          | GN01                    | 0.596*** |
|                                                                     |                          | WOR-1                   | 0.587**  |
|                                                                     |                          | Aerophobota             | 0.555**  |
|                                                                     |                          | Chloroflexi             | 0.549**  |
|                                                                     |                          | Nitrospirota            | 0.538**  |
|                                                                     |                          | Methylomirabilota       | 0.532*** |
|                                                                     |                          | NB1-j                   | 0.505*   |
|                                                                     |                          | Elusimicrobiota         | 0.499**  |
|                                                                     |                          | Dadabacteria            | 0.496**  |
|                                                                     |                          | SAR324 clade            | 0.492*** |
|                                                                     |                          | Gemmatimonadota         | 0.490*   |
|                                                                     |                          | Marinimicrobia (SAR406) | 0.452*   |
|                                                                     |                          | AncK6                   | 0.442*** |
|                                                                     |                          | MBNT15                  | 0.440*   |
|                                                                     |                          | Zixibacteria            | 0.436*   |
|                                                                     |                          | Patescibacteria         | 0.407*   |
|                                                                     | Tiny Bubbles + Clamshell | Actinobacteriota        | 0.597**  |
|                                                                     |                          | Bacteroidota            | 0.512**  |
|                                                                     | Kilo                     | Schekmanbacteria        | 0.725*** |
|                                                                     |                          | Deferrisomatota         | 0.678*** |
|                                                                     |                          | Modulibacteria          | 0.665*** |
|                                                                     |                          | Campylobacterota        | 0.604**  |
|                                                                     |                          | DTB120                  | 0.550**  |
| <b>Location – Illumina samples<br/>(all sequences)<br/>(n = 40)</b> | Purple Haze              | WS2                     | 0.808*** |
|                                                                     |                          | Acetothermia            | 0.708*** |
|                                                                     |                          | Cloacimonadota          | 0.706*** |
|                                                                     |                          | Caldatribacteriota      | 0.681*** |
|                                                                     |                          | CK-2C2-2                | 0.667*** |
|                                                                     |                          | Dependentiae            | 0.643*** |
|                                                                     |                          | Fermentibacterota       | 0.554**  |
|                                                                     |                          | Patescibacteria         | 0.553**  |
|                                                                     |                          | Desantisbacteria        | 0.521*   |
|                                                                     |                          | Caldisericota           | 0.505*   |
|                                                                     |                          | Desulfobacterota        | 0.486**  |
|                                                                     |                          | TA06                    | 0.485*   |
|                                                                     |                          | FCPU426                 | 0.478*   |
|                                                                     |                          | Marinimicrobia (SAR406) | 0.405*   |
|                                                                     | 175NW                    | Acidobacteriota         | 0.917*** |
|                                                                     |                          | Planctomycetota         | 0.828*** |
|                                                                     |                          | Armatimonadota          | 0.670*** |
|                                                                     |                          | Aerophobota             | 0.664*** |
|                                                                     |                          | Unknown                 | 0.643*** |
|                                                                     |                          | Sumerlaeota             | 0.616**  |
|                                                                     |                          | Methylomirabilota       | 0.603*** |
|                                                                     |                          | 10bav-F6                | 0.578**  |
|                                                                     |                          | BH180-139               | 0.563**  |
|                                                                     |                          | Nitrospinota            | 0.561**  |
|                                                                     |                          | Nitrospirota            | 0.559**  |
|                                                                     |                          | Chlorovlexi             | 0.550**  |
|                                                                     |                          | Dadabacteria            | 0.525**  |
|                                                                     |                          | WOR-1                   | 0.495*   |
|                                                                     |                          | SAR324 clade            | 0.493**  |
|                                                                     |                          | Hydrogenedentes         | 0.492*   |
|                                                                     |                          | NB1-j                   | 0.492*   |
|                                                                     |                          | MBNT15                  | 0.485*   |
|                                                                     |                          | Gemmatimonadota         | 0.425*   |
|                                                                     | Verrucomicrobiota        | 0.397*                  |          |
|                                                                     | Actinobacteriota         | 0.713***                |          |

|  |                          |                  |          |
|--|--------------------------|------------------|----------|
|  | Tiny Bubbles + Clamshell | Bacteroidota     | 0.437*   |
|  |                          | Myxococcota      | 0.406*   |
|  | Kilo                     | Deferrisomatota  | 0.777*** |
|  |                          | Campylobacterota | 0.689*** |
|  |                          | DTB120           | 0.676*** |
|  |                          | Poribacteria     | 0.664*** |
|  |                          | Fibrobacterota   | 0.577**  |
|  |                          | NKB15            | 0.571**  |
|  |                          | Schekmanbacteria | 0.534**  |
|  |                          | Margulisbacteria | 0.431*   |

**S4 Table. ANOSIM and Mantel statistics calculated with Bray-Curtis dissimilarity for Illumina and Nanopore data sets combined at various taxonomic levels.**

| <b>Taxonomic Level</b> | <b>ANOSIM – Sequencing Technology (<i>p</i> value)</b> | <b>ANOSIM – Site (<i>p</i> value)</b> | <b>Mantel – Depth (<i>p</i> value)</b> |
|------------------------|--------------------------------------------------------|---------------------------------------|----------------------------------------|
| Phylum                 | 0.06 (0.008)                                           | 0.38 (< 1e <sup>-4</sup> )            | 0.33 (< 1e <sup>-4</sup> )             |
| Class                  | 0.05 (0.02)                                            | 0.41 (< 1e <sup>-4</sup> )            | 0.34 (< 1e <sup>-4</sup> )             |
| Order                  | 0.07 (0.006)                                           | 0.50 (< 1e <sup>-4</sup> )            | 0.29 (< 1e <sup>-4</sup> )             |
| Family                 | 0.06 (0.01)                                            | 0.53 (< 1e <sup>-4</sup> )            | 0.28 (< 1e <sup>-4</sup> )             |
| Genus                  | 0.12 (< 1e <sup>-4</sup> )                             | 0.44 (< 1e <sup>-4</sup> )            | 0.22 (< 1e <sup>-4</sup> )             |
| Phylotype*             | 0.13 (< 1e <sup>-4</sup> )                             | 0.49 (< 1e <sup>-4</sup> )            | 0.35 (< 1e <sup>-4</sup> )             |

\*highest taxonomic classification

**S5 Table. Differentially abundant phyla identified for various groupings.** Calculated by the *multipatt* function in the package *indicspecies* with the number of reads per sample subsampled to 1000. Significance codes: 0\*\*\* ; 0.001\*\* ; 0.01\*

| Test                                                                   | Group                                                                  | Phylum                   | Score            |
|------------------------------------------------------------------------|------------------------------------------------------------------------|--------------------------|------------------|
| Location – Nanopore samples<br>(1000 sequences per sample)<br>(n = 40) | Purple Haze                                                            | Caldatribacteriota       | 0.635***         |
|                                                                        |                                                                        | WS2                      | 0.612***         |
|                                                                        |                                                                        | Acetothermia             | 0.536**          |
|                                                                        |                                                                        | Cloacimonadota           | 0.485*           |
|                                                                        |                                                                        | Desulfobacterota         | 0.481*           |
|                                                                        |                                                                        | Caldisericotota          | 0.450**          |
|                                                                        | 175NW                                                                  | Unknown                  | 0.854***         |
|                                                                        |                                                                        | Sumerlaeota              | 0.841***         |
|                                                                        |                                                                        | Acidobacteriota          | 0.831***         |
|                                                                        |                                                                        | Planctomycetota          | 0.810***         |
|                                                                        |                                                                        | Nitrospinota             | 0.697***         |
|                                                                        |                                                                        | Armatimonadota           | 0.642***         |
|                                                                        |                                                                        | Verrucomicrobiota        | 0.615***         |
|                                                                        |                                                                        | BH180-139                | 0.588**          |
|                                                                        |                                                                        | Hydrogenedentes          | 0.568***         |
|                                                                        |                                                                        | Chloroflexi              | 0.559**          |
|                                                                        |                                                                        | 10bav-F6                 | 0.550**          |
|                                                                        |                                                                        | Elusimicrobiota          | 0.525**          |
|                                                                        |                                                                        | Methylomirabilota        | 0.507***         |
|                                                                        |                                                                        | Nitrospirota             | 0.496*           |
|                                                                        |                                                                        | NB1-j                    | 0.493*           |
|                                                                        |                                                                        | Gemmatimonadota          | 0.493*           |
|                                                                        |                                                                        | WOR-1                    | 0.489**          |
|                                                                        |                                                                        | Aerophobota              | 0.480**          |
|                                                                        |                                                                        | Bdellovibrionota         | 0.476*           |
|                                                                        |                                                                        | SAR324 clade             | 0.475***         |
|                                                                        |                                                                        | Tiny Bubbles + Clamshell | Actinobacteriota |
|                                                                        | Bacteroidota                                                           |                          | 0.54**           |
|                                                                        | Kilo                                                                   | Schekmanbacteria         | 0.705***         |
|                                                                        |                                                                        | Campylobacterota         | 0.619**          |
|                                                                        |                                                                        | DTB120                   | 0.517*           |
|                                                                        |                                                                        | Deferrisomatota          | 0.438*           |
|                                                                        | Location – Illumina samples<br>(1000 sequences per sample)<br>(n = 40) | Purple Haze              | WS2              |
| Cloacimonadota                                                         |                                                                        |                          | 0.682***         |
| Caldatribacteriota                                                     |                                                                        |                          | 0.682***         |
| Acetothermia                                                           |                                                                        |                          | 0.673***         |
| Dependentiae                                                           |                                                                        |                          | 0.557***         |
| CK-2C2-2                                                               |                                                                        |                          | 0.540**          |
| Patescibacteria                                                        |                                                                        |                          | 0.538**          |
| Desulfobacterota                                                       |                                                                        |                          | 0.472*           |
| Fermentibacterota                                                      |                                                                        |                          | 0.459*           |
| TA06                                                                   |                                                                        |                          | 0.452*           |
| 175NW                                                                  |                                                                        | Acidobacteriota          | 0.910***         |
|                                                                        |                                                                        | Planctomycetota          | 0.811***         |
|                                                                        |                                                                        | Methylomirabilota        | 0.599***         |
|                                                                        |                                                                        | Nitrospirota             | 0.593**          |
|                                                                        |                                                                        | Aerophobota              | 0.583**          |
|                                                                        |                                                                        | Armatimonadota           | 0.583**          |
|                                                                        |                                                                        | 10bav-F6                 | 0.559**          |
|                                                                        |                                                                        | Chloroflexi              | 0.538**          |
|                                                                        |                                                                        | Nitrospinota             | 0.527**          |

|  |                          |                  |          |
|--|--------------------------|------------------|----------|
|  |                          | Unknown          | 0.515*   |
|  |                          | NB1-j            | 0.492*   |
|  |                          | Dadabacteria     | 0.468*   |
|  |                          | SAR324 clade     | 0.449**  |
|  |                          | WOR-1            | 0.438*   |
|  | Tiny Bubbles + Clamshell | Actinobacteriota | 0.670*** |
|  |                          | Myxococcota      | 0.474*   |
|  |                          | Bacteroidota     | 0.434*   |
|  | Kilo                     | Campylobacterota | 0.686*** |
|  |                          | Fibrobacterota   | 0.629**  |
|  |                          | Schekmanbacteria | 0.609**  |

**S6 Table. Significantly differentially abundant genera identified for various groupings within the Nanopore data.** Calculated by the *multipatt* function in the package *indicspecies* with either no subsampling or libraries subsampled to 1000 reads. Only showing highly significant results,  $p < 0.001^{***}$

| Test                                                 | Group                                                            | Genus                      | Score                  |
|------------------------------------------------------|------------------------------------------------------------------|----------------------------|------------------------|
| Location – Nanopore samples (all sequences) (n = 40) | Purple Haze                                                      | SEEP-SRB1                  | 0.678***               |
|                                                      |                                                                  | 175NW                      | Candidatus Omnitrophus |
|                                                      | 175NW                                                            | Methyloligella             | 0.866***               |
|                                                      |                                                                  | Sumerlaea                  | 0.860***               |
|                                                      |                                                                  | SM23-31                    | 0.780***               |
|                                                      |                                                                  | Bythopirellula             | 0.664***               |
|                                                      |                                                                  | Spirochaeta                | 0.631***               |
|                                                      |                                                                  | Filomicrobium              | 0.616***               |
|                                                      |                                                                  | P3OB-42                    | 0.610***               |
|                                                      |                                                                  | Limibacillus               | 0.556***               |
|                                                      |                                                                  | Wb1-A12                    | 0.532***               |
|                                                      |                                                                  | Tiny Bubbles + Clamshell   | Pltb-vmat-59           |
|                                                      | Actibacter                                                       |                            | 0.765***               |
|                                                      | Defluviicoccus                                                   |                            | 0.751***               |
|                                                      | Desulfobulbus                                                    |                            | 0.713***               |
|                                                      | Subgroup 23                                                      |                            | 0.703***               |
|                                                      | IheB2-23                                                         |                            | 0.695***               |
|                                                      | TPD-58                                                           |                            | 0.642***               |
|                                                      | Marinimicrobium                                                  |                            | 0.636***               |
|                                                      | Kilo                                                             | MSBL7                      | 0.816***               |
|                                                      |                                                                  | Calorithrix                | 0.768***               |
|                                                      |                                                                  | Prolixibacter              | 0.716***               |
|                                                      |                                                                  | Candidatus Thiodiazotropha | 0.687***               |
|                                                      |                                                                  | Sulfurovum                 | 0.681***               |
|                                                      |                                                                  | Deferrisoma                | 0.678***               |
|                                                      |                                                                  | Candidatus Thiopilula      | 0.666***               |
|                                                      |                                                                  | Desulfocapsa               | 0.585***               |
|                                                      |                                                                  | Marinosulfonomonas         | 0.575***               |
|                                                      |                                                                  | Chitinivibrio              | 0.548***               |
|                                                      |                                                                  | Pseudozobellia             | 0.542***               |
|                                                      |                                                                  | Mangrovibacterium          | 0.510***               |
|                                                      | Location – Nanopore samples (1000 sequences per sample) (n = 40) | Purple Haze                | SEEP-SRB1              |
| 175NW                                                |                                                                  |                            | Candidatus Omnitrophus |
| 175NW                                                |                                                                  | Methyloligella             | 0.747***               |
|                                                      |                                                                  | Sumerlaea                  | 0.680***               |
|                                                      |                                                                  | Wb1-A12                    | 0.548***               |
|                                                      |                                                                  | Tiny Bubbles + Clamshell   | Defluviicoccus         |
| Subgroup 23                                          |                                                                  |                            | 0.730***               |
| Marinimicrobium                                      |                                                                  |                            | 0.692***               |
| Marine Methylotrophic Group 2                        |                                                                  |                            | 0.663***               |
| Kilo                                                 |                                                                  |                            | MSBL7                  |
|                                                      |                                                                  | Candidatus Thiodiazotropha | 0.679***               |
|                                                      |                                                                  | Sulfurovum                 | 0.678***               |
|                                                      |                                                                  | Deferrisoma                | 0.625***               |
|                                                      |                                                                  | Fusibacter                 | 0.468***               |

**S7 Table. Example of costs associated with 16S rRNA *in situ* sequencing using a Nanopore MinION and Flongle adapter and the *SituSeq* workflow.**

| Item                                                              | Company  | Cost (USD) | Cost per sample (USD) |
|-------------------------------------------------------------------|----------|------------|-----------------------|
| <b><i>DNA Extraction</i></b>                                      |          |            |                       |
| DNA extraction kit<br>DNeasy PowerLyzer PowerSoil kit             | Qiagen   | 396        | 8                     |
| DNA polymerase<br>KAPA HiFi HotStart master mix                   | Roche    | 750        | 6                     |
| <b><i>Nanopore Sequencing</i></b>                                 |          |            |                       |
| minION                                                            | Nanopore | 1000       |                       |
| minIT*/good laptop^                                               | Nanopore | 2000       |                       |
| Flongle flowcell                                                  | Nanopore | 90         | 7.5 (12 samples)      |
| Flongle adapter starter pack<br>(contains adapter + 12 flowcells) | Nanopore | 1460       |                       |
| 16S Barcoding kit<br>(12 barcodes, 6 reactions)                   | Nanopore | 650        | ~9                    |
| <b><i>Totals</i></b>                                              |          |            |                       |
| Cost for consumables (per sample)**                               |          | 30.5       |                       |
| Costs for equipment**                                             |          | 4460       |                       |

\*minIT has been discontinued

^a laptop with good specs (e.g. Dell Inspiron 13-7378 laptop with 16 GB RAM and 512 GB SSD)

\*\*Costs do not include consumables like pipette tips, tubes, etc., or other lab equipment like centrifuges and PCR machines. See Edwards et al. (2022) or Werner et al. (2022) for further information on detailed packing lists and tips for *in situ* sequencing in the field.

**Supplementary Data (separate files):**

S1 Data. *SituSeq* code

S2 Data. Sequences for species of interest BLAST search

S3 Data. Abundance of taxonomic phylotypes assigned to Nanopore sequences across samples

S4 Data. Abundance of taxonomic phylotypes assigned to Illumina sequences across samples
